# Supplementary material for: Sequential infection experiments for quantifying innate and adaptive immunity during influenza infection
Source: PubMed Central journal article supplement (PMC6353225; doi:10.1371/journal.pcbi.1006568), 2019-01-17
Supplement: pcbi.1006568.s001.pdf [file pcbi.1006568.s001.pdf]

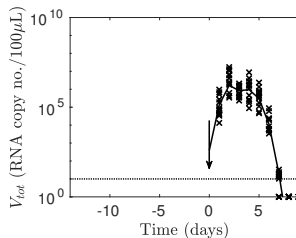

(a) single infection  
(challenge only)

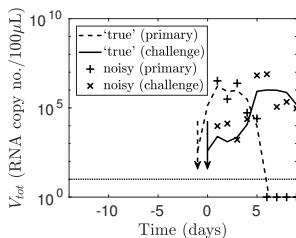

(b) 1-day interval

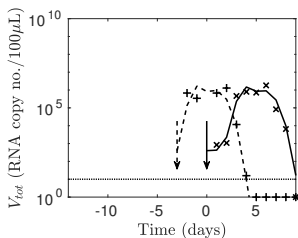

(c) 3-day interval

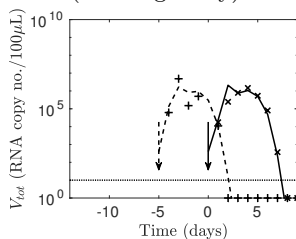

(d) 5-day interval

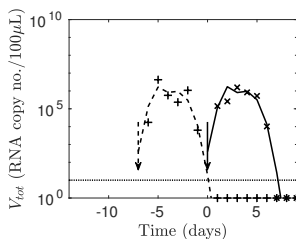

(e) 7-day interval

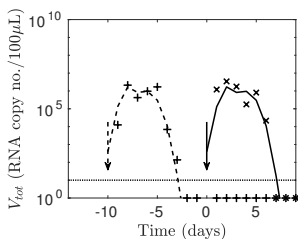

(f) 10-day interval

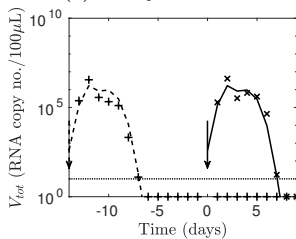

(g) 14-day interval
