# Supplementary material for: Sequential infection experiments for quantifying innate and adaptive immunity during influenza infection
Source: PubMed Central journal article supplement (PMC6353225; doi:10.1371/journal.pcbi.1006568), 2019-01-17
Supplement: pcbi.1006568.s003.pdf [file pcbi.1006568.s003.pdf]

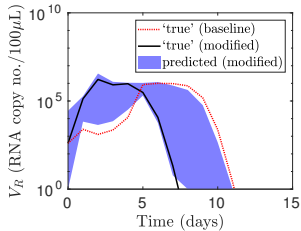

(a) XI1

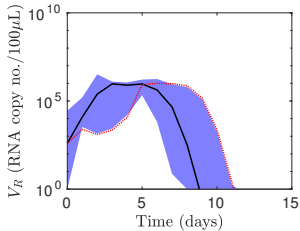

(b) XI2

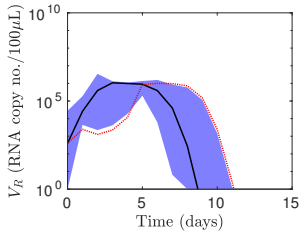

(c) XI3
