# Supplementary material for: Sequential infection experiments for quantifying innate and adaptive immunity during influenza infection
Source: PubMed Central journal article supplement (PMC6353225; doi:10.1371/journal.pcbi.1006568), 2019-01-17

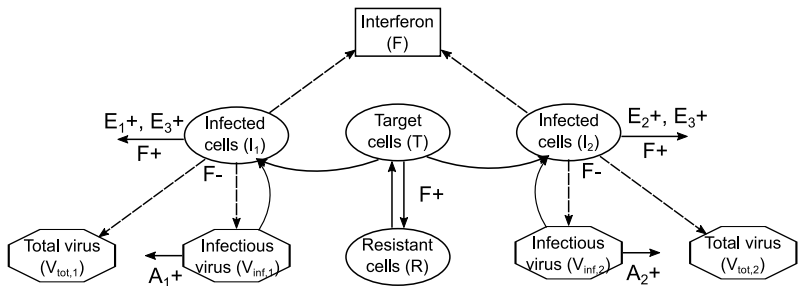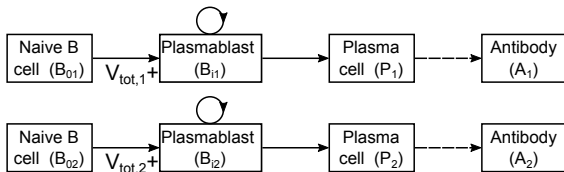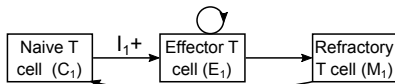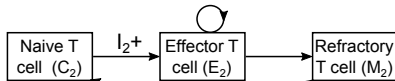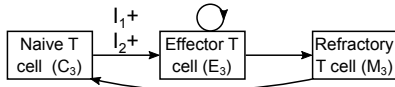

Supplement: pcbi.1006568.s004.pdf [file pcbi.1006568.s004.pdf]
