# Supplementary material for: Sequential infection experiments for quantifying innate and adaptive immunity during influenza infection
Source: PubMed Central journal article supplement (PMC6353225; doi:10.1371/journal.pcbi.1006568), 2019-01-17
Supplement: pcbi.1006568.s016.pdf [file pcbi.1006568.s016.pdf]

## Table S3

| Experiment           | Parameter                               | Value              | Prior bounds   | units             |
|----------------------|-----------------------------------------|--------------------|----------------|-------------------|
| Single infection     | $\log_{10} k_{C11}$                     | 5.05               | $[-1, 10]$     | infected cell     |
|                      | $\log_{10} k_{C21}$                     | 6                  | $[-1, 10]$     | infected cell     |
|                      | $\log_{10} \kappa_{E11}$                | $\log_{10} 0.0081$ | $[-10, 3]$ [1] | day <sup>-1</sup> |
| Sequential infection | $\log_{10} k_{C11} = \log_{10} k_{C22}$ | 5.05               | $[-1, 10]$     | infected cell     |
|                      | $k_{C12} = k_{C21}$                     | $\infty$           | fixed          | infected cell     |
|                      | $\log_{10} k_{C31} = \log_{10} k_{C32}$ | 6                  | $[-1, 10]$     | infected cell     |
|                      | $\log_{10} \kappa_{E11}$                | $\log_{10} 0.0081$ | $[-10, 3]$ [1] | day <sup>-1</sup> |

†

## References

- [1] Barchet W, Oehen S, Klenerman P, Wodarz D, Bocharov G, Lloyd AL, et al. Direct quantitation of rapid elimination of viral antigen-positive lymphocytes by antiviral CD8(+) T cells in vivo. *Eur J Immunol.* 2000;30(5):1356–63. doi:10.1002/(SICI)1521-4141(200005)30:5<1356::AID-IMMU1356>3.0.CO;2-K.
